# Supplementary material for: A facile electrochemical approach for the deposition of iron–manganese phosphate composite coatings on aluminium
Source: Royal Society of Chemistry journal article supplement (doi:10.1039/c4ra08195a), 2014-11-24
Supplement: c4ra08195a2.pdf [file c4ra08195a2.pdf]

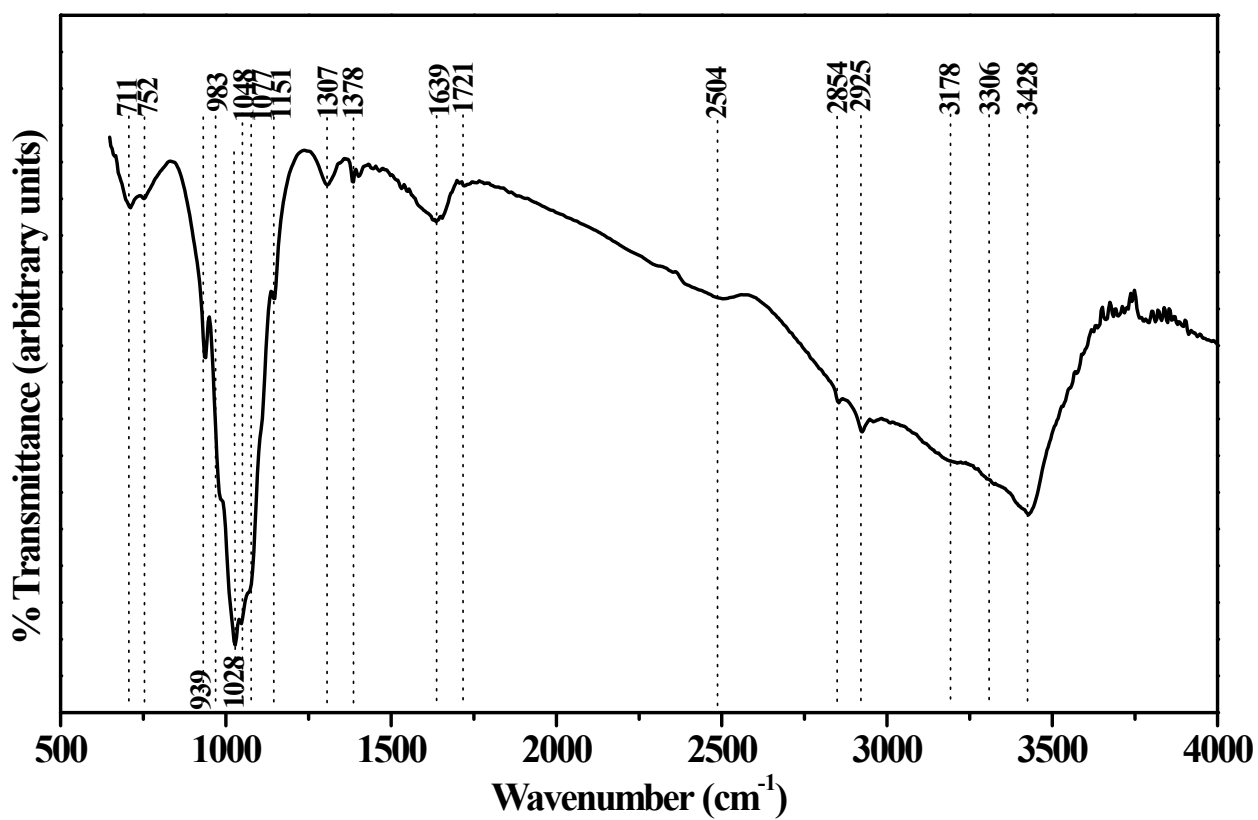

Supplement 2: FT-IR spectrum of manganese phosphate coatings deposited on the mild steel anode at 4 mA/cm<sup>2</sup>
