# Supplementary material for: A facile electrochemical approach for the deposition of iron–manganese phosphate composite coatings on aluminium
Source: Royal Society of Chemistry journal article supplement (doi:10.1039/c4ra08195a), 2014-11-24
Supplement: c4ra08195a3.pdf [file c4ra08195a3.pdf]

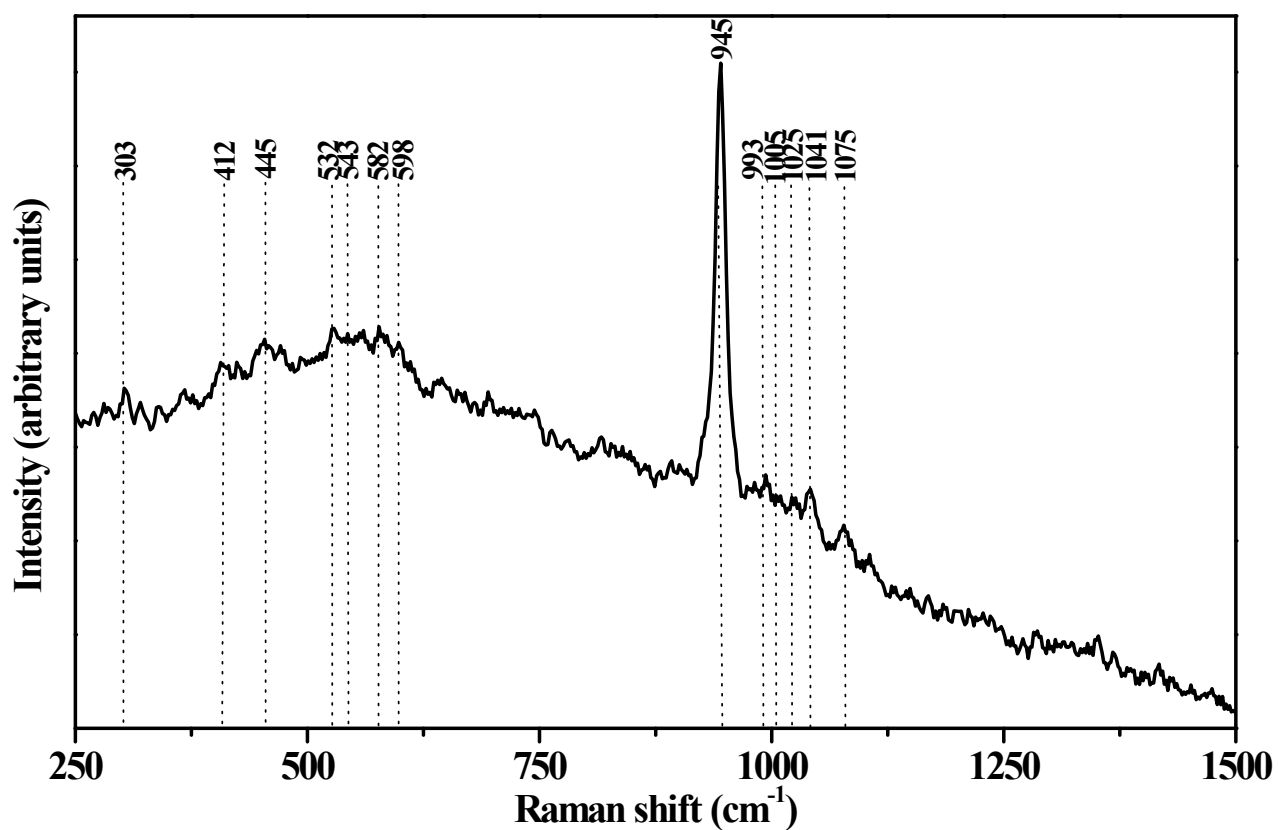

Supplement 3: Raman spectrum of the manganese phosphate coating deposited on the mild steel anode at 4 mA/cm<sup>2</sup>
