# Supplementary material for: A facile electrochemical approach for the deposition of iron–manganese phosphate composite coatings on aluminium
Source: Royal Society of Chemistry journal article supplement (doi:10.1039/c4ra08195a), 2014-11-24
Supplement: c4ra08195a4.pdf [file c4ra08195a4.pdf]

Supplement 4: Assignment of IR and Raman bands of the manganese phosphate coatings deposited on mild steel

| IR bands<br>( $\text{cm}^{-1}$ ) | Assignment                                                                 | Raman bands<br>( $\text{cm}^{-1}$ ) | Assignment                                                                 |
|----------------------------------|----------------------------------------------------------------------------|-------------------------------------|----------------------------------------------------------------------------|
| 3428                             | $\nu(\text{O-H})$ of $\text{H}_2\text{O}$ (stretching)                     | 1075                                | $\nu_3\text{HPO}_4^{2-}$ and $\text{PO}_4^{3-}$ (antisymmetric stretching) |
| 3306                             | $\nu(\text{O-H})$ of $\text{H}_2\text{O}$ (stretching)                     | 1041                                | $\nu_3\text{HPO}_4^{2-}$ and $\text{PO}_4^{3-}$ (antisymmetric stretching) |
| 3178                             | $\nu(\text{O-H})$ of $\text{H}_2\text{O}$ (stretching)                     | 1025                                | $\nu_3\text{HPO}_4^{2-}$ and $\text{PO}_4^{3-}$ (antisymmetric stretching) |
| 2925                             | $\nu(\text{O-H})$ of $\text{H}_2\text{PO}_4^-$ (stretching)                | 1005                                | $\nu_3\text{HPO}_4^{2-}$ and $\text{PO}_4^{3-}$ (antisymmetric stretching) |
| 2854                             | $\nu(\text{O-H})$ of $\text{H}_2\text{PO}_4^-$ (stretching)                | 993                                 | $\nu_1(\text{PO}_4^{3-})$ (stretching)                                     |
| 2504                             | $\nu(\text{O-H})$ of $\text{H}_2\text{PO}_4^-$ (stretching)                | 945                                 | $\nu_1(\text{P-O})$ of $(\text{HPO}_4^{2-})$ (stretching)                  |
| 1721                             | $\delta(\text{H-O-H})$ of $\text{H}_2\text{O}$ (bending)                   | 598                                 | $\nu_4 \text{HPO}_4^{2-}$ and $\text{PO}_4^{3-}$ (out of plane bending)    |
| 1639                             | $\delta(\text{H-O-H})$ of $\text{H}_2\text{O}$ (bending)                   | 582                                 | $\nu_4 \text{HPO}_4^{2-}$ and $\text{PO}_4^{3-}$ (out of plane bending)    |
| 1378                             | P=O Stretching                                                             | 543                                 | $\nu_4 \text{HPO}_4^{2-}$ and $\text{PO}_4^{3-}$ (out of plane bending)    |
| 1307                             | $\delta(\text{P-O-H})$ of $(\text{HPO}_4)^{2-}$ (bending)                  | 532                                 | $\nu_4 \text{HPO}_4^{2-}$ and $\text{PO}_4^{3-}$ (out of plane bending)    |
| 1151                             | $\nu_3\text{HPO}_4^{2-}$ and $\text{PO}_4^{3-}$ (antisymmetric stretching) | 455                                 | $\nu_2 \text{HPO}_4^{2-}$ and $\text{PO}_4^{3-}$ (bending)                 |
| 1077                             | $\nu_3\text{HPO}_4^{2-}$ and $\text{PO}_4^{3-}$ (antisymmetric stretching) | 412                                 | $\nu_2 \text{HPO}_4^{2-}$ and $\text{PO}_4^{3-}$ (bending)                 |
| 1048                             | $\nu_3\text{HPO}_4^{2-}$ and $\text{PO}_4^{3-}$ (antisymmetric stretching) | 303                                 | $\delta(\text{M-O})$ (bending)                                             |
| 1028                             | $\nu_3\text{HPO}_4^{2-}$ and $\text{PO}_4^{3-}$ (antisymmetric stretching) |                                     |                                                                            |
| 983                              | $\nu_s(\text{PO}_4)^{3-}$ (symmetric stretching)                           |                                     |                                                                            |
| 983                              | $\nu(\text{Mn=O})$ and $\nu(\text{Mn-O-Mn})$ (stretching)                  |                                     |                                                                            |
| 939                              | $\nu(\text{P-O})$ of $\text{HPO}_4^{2-}$ (stretching)                      |                                     |                                                                            |
| 752                              | $\nu_s(\text{P-O})$ of $(\text{PO}_4)^{3-}$ (symmetric stretching)         |                                     |                                                                            |
| 711                              | $\nu_s(\text{P-O})$ of $(\text{PO}_4)^{3-}$ (symmetric stretching)         |                                     |                                                                            |
| 711                              | $\nu(\text{Mn=O})$ and $\nu(\text{Mn-O-Mn})$ (stretching)                  |                                     |                                                                            |
